# Supplementary material
Source: publisher figshare collection journal article supplement (https://tandf.figshare.com/ndownloader/files/21653466)
Supplement: Supplementary file 1 [file 21653466]

## Supplementary data

### Two new phenolic glycosides with anti-complementary activity from the roots of *Sanguisorba officinalis* L.

Rongshen Wang<sup>a†</sup>, Jinfeng Sun<sup>a†</sup>, Mei Jin<sup>b</sup>, Chao Ye<sup>a</sup>, Jiaming Wang<sup>a</sup>, Long Jin<sup>a</sup>, Ying Jie Ma<sup>a, c\*</sup>, Wei Zhou<sup>a\*</sup>, Gao Li<sup>a\*</sup>

<sup>a</sup>Key Laboratory of Natural Resources of Changbai Mountain and Functional Molecules, Ministry of Education, Yanbian University College of Pharmacy, Yanji, P. R. China

<sup>b</sup>Department of Pharmacy, Yanbian University Hospital, Yanji, P. R. China

<sup>c</sup>The Laboratory of Molecular Medicine, Department of Clinical Immunology, Section 7631, Rigshospitalet, Faculty of Health and Medical Sciences, University of Copenhagen, Copenhagen, Denmark

**Abstract:** *Sanguisorba officinalis* L. is a traditional herbal plant that belongs to the genus *Sanguisorba* and the family Rosaceae. Two new phenolic glycosides (**1–2**), ten known phenolics (**3–12**), and six known monoterpenoid glycosides (**13–18**) were isolated from the roots of *S. officinalis* using silica gel column and preparative middle pressure liquid chromatography (MPLC). The chemical structures were elucidated based on extensive spectroscopic experiments, including 1D and 2D NMR as well as HR-ESI-MS, and comparison with those reported in the literature. Compounds **3–5**, and **13** were isolated from the Rosaceae family and compound **7** was obtained from the genus *Sanguisorba* for the first time. Additionally, all compounds were evaluated for their anti-complementary activities against the classical pathway. Furthermore, compounds **1**, **5**, **9**, and **14** showed significant anti-complementary activities with the 50% hemolytic inhibition concentrations (CH<sub>50</sub>) values of  $0.40 \pm 0.03$ ,  $0.57 \pm 0.01$ ,  $0.51 \pm 0.07$ , and  $0.53 \pm 0.05$  mM, respectively.

**Keywords:** *Sanguisorba officinalis* L.; Rosaceae; phenolic glycoside; monoterpenoid glycoside; anti-complementary activity

## List of Figures

Figure S1: The key HMBC correlations of compounds **1–2**

Figure S2:  $^1\text{H}$  NMR spectrum of compound **1** in methanol- $d_4$  (500 MHz)

Figure S3:  $^{13}\text{C}$  NMR spectrum of compound **1** in methanol- $d_4$  (125 MHz)

Figure S4: HMQC spectrum of compound **1** in methanol- $d_4$

Figure S5: HMBC spectrum of compound **1** in methanol- $d_4$

Figure S6: NOESY spectrum of compound **1** in methanol- $d_4$

Figure S7: HR-ESI-MS of compound **1**

Figure S8:  $^1\text{H}$  NMR spectrum of compound **2** in methanol- $d_4$  (500 MHz)

Figure S9:  $^{13}\text{C}$  NMR spectrum of compound **2** in methanol- $d_4$  (125 MHz)

Figure S10: HMQC spectrum of compound **2** in methanol- $d_4$

Figure S11: HMBC spectrum of compound **2** in methanol- $d_4$

Figure S12: NOESY spectrum of compound **2** in methanol- $d_4$

Figure S13: HR-ESI-MS of compound **2**

Figure S14: Targets of compounds **1** (A), **5** (B), **9** (C), and **14** (D) in complement activation cascade. 1-, 5-, 9-, and 14-treated sera were mixed with various complement-depleted (C-depleted) sera, and the capacity to restore hemolytic capacity of depleted sera by the CP was estimated by adding sheep antibody-sensitized erythrocytes. Data were expressed as mean  $\pm$  SD (n = 3).

## List of Table

Table S1: Anti-complementary activity through the classical pathway (CP) of compounds **1–18**

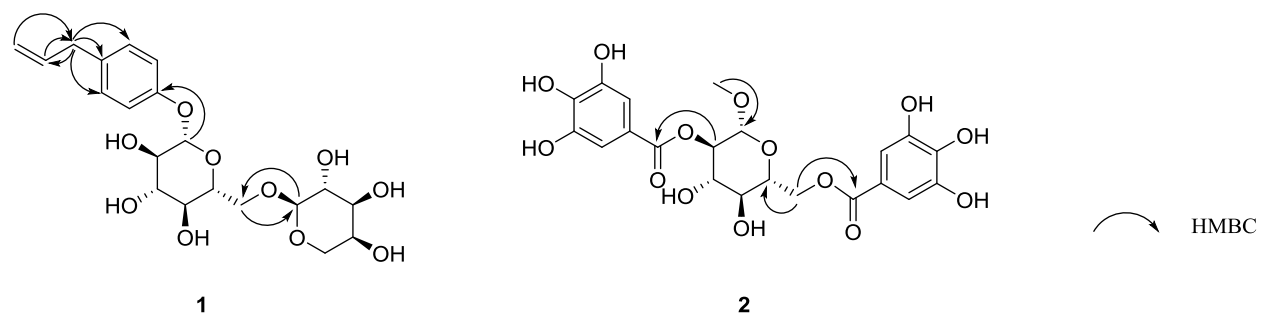

Figure S1: The key HMBC correlations of compounds **1–2**

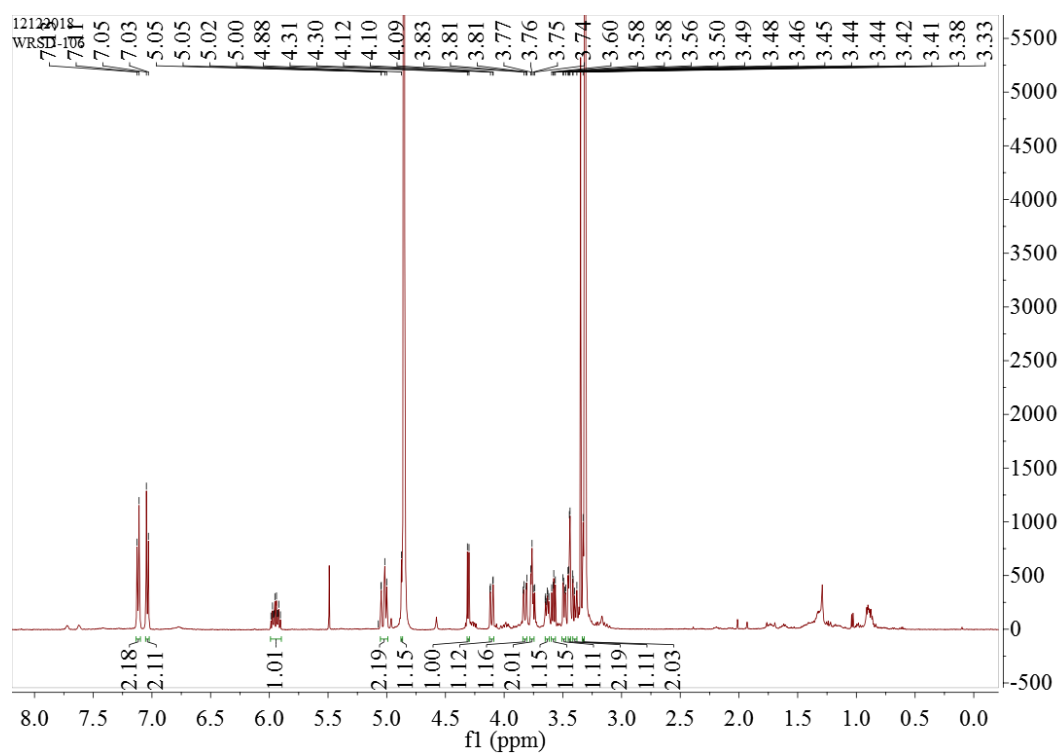

Figure S2:  $^1\text{H}$  NMR spectrum of compound **1** in methanol- $d_4$  (500 MHz)

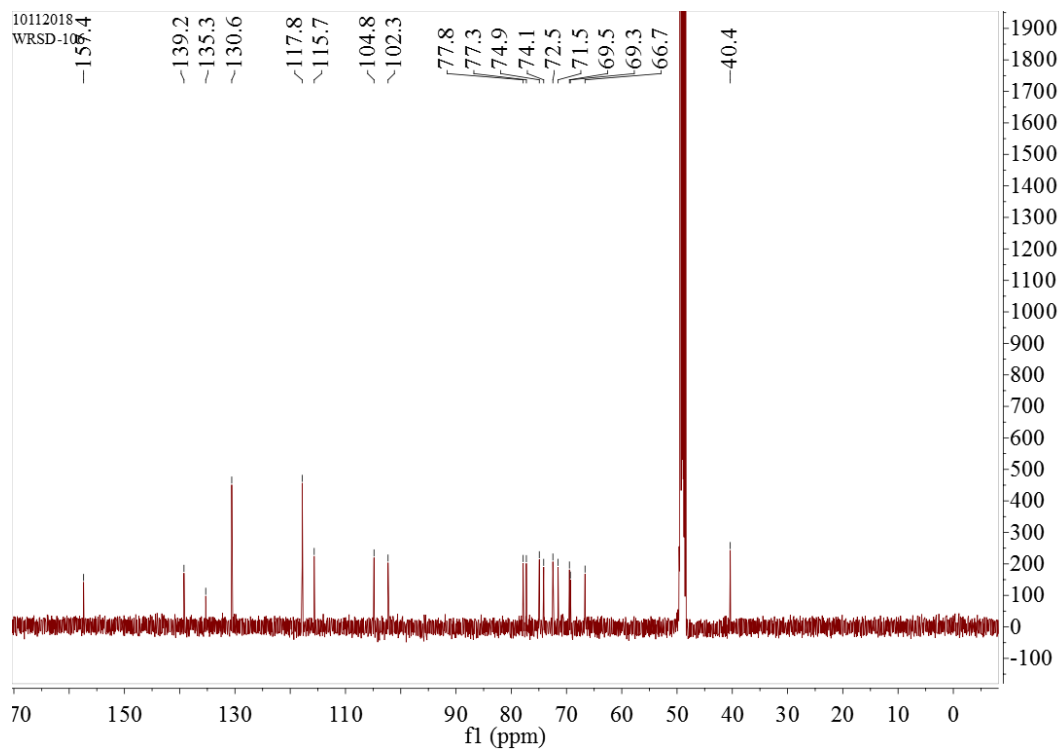

Figure S3:  $^{13}\text{C}$  NMR spectrum of compound **1** in methanol- $d_4$  (125 MHz)

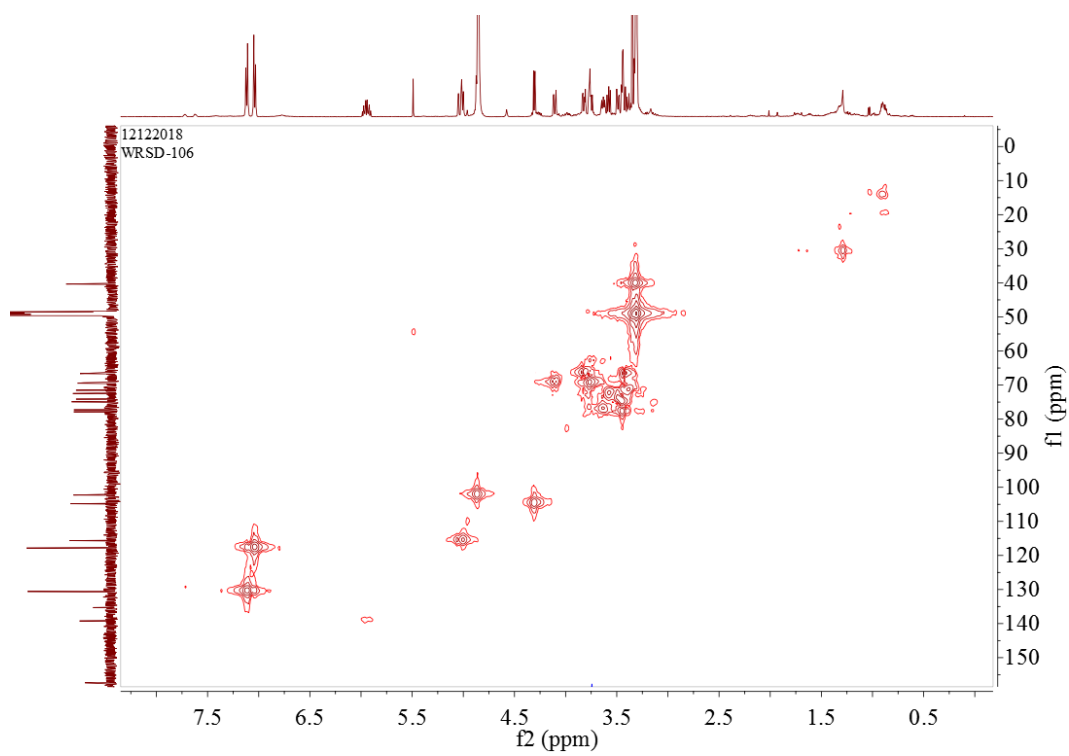

Figure S4: HMQC spectrum of compound **1** in methanol- $d_4$

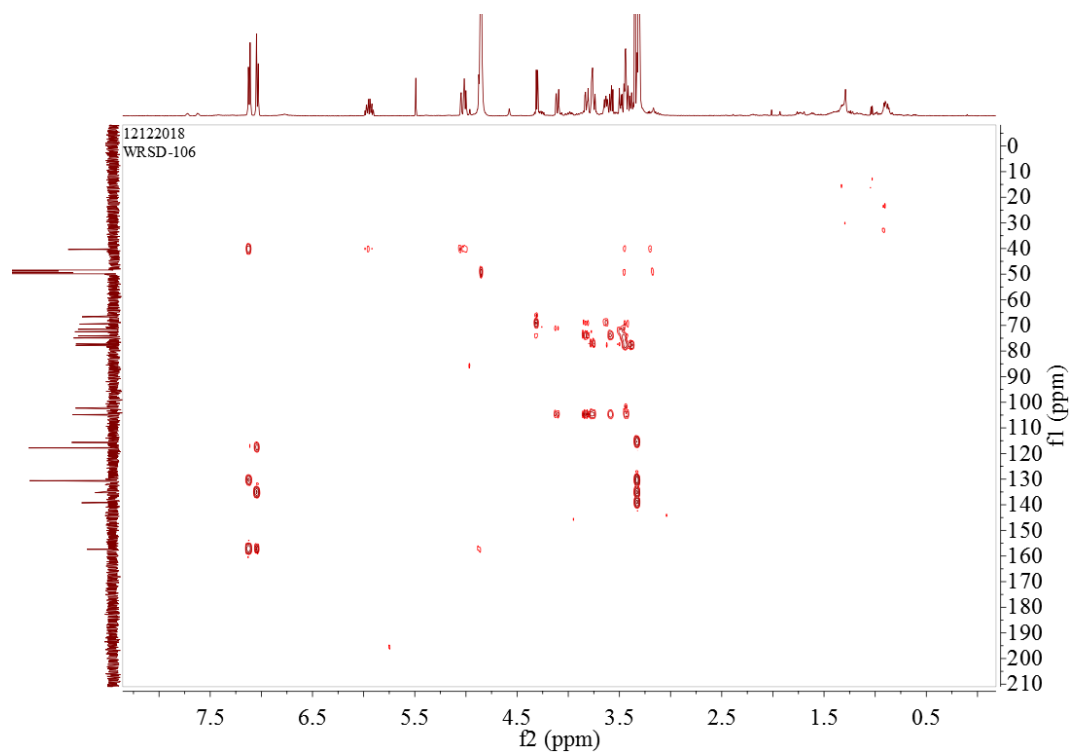

Figure S5: HMBC spectrum of compound **1** in methanol-*d*<sub>4</sub>

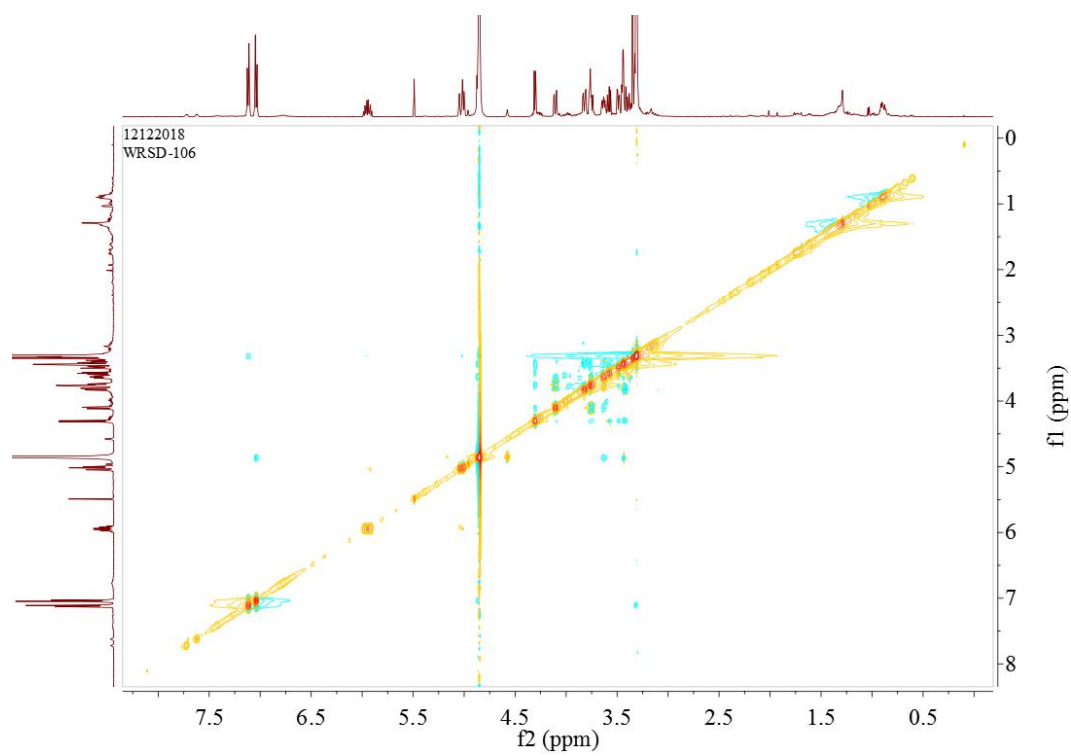

Figure S6: NOESY spectrum of compound **1** in methanol-*d*<sub>4</sub>

# Mass Spectrum SmartFormula Report

## Analysis Info

Analysis Name D:\Data\20190313\WRSD-106\_P1-A-3\_01\_10849.d  
Method lc-ms4-hr-low.m  
Sample Name WRSD-106  
Comment

Acquisition Date 3/13/2019 11:47:17 PM

Operator zlwei  
Instrument / Ser# micrOTOF-Q II 10351

## Acquisition Parameter

|             |          |                       |           |                  |           |
|-------------|----------|-----------------------|-----------|------------------|-----------|
| Source Type | ESI      | Ion Polarity          | Positive  | Set Nebulizer    | 0.4 Bar   |
| Focus       | Active   | Set Capillary         | 4500 V    | Set Dry Heater   | 200 °C    |
| Scan Begin  | 50 m/z   | Set End Plate Offset  | -500 V    | Set Dry Gas      | 5.0 l/min |
| Scan End    | 1200 m/z | Set Collision Cell RF | 100.0 Vpp | Set Divert Valve | Waste     |

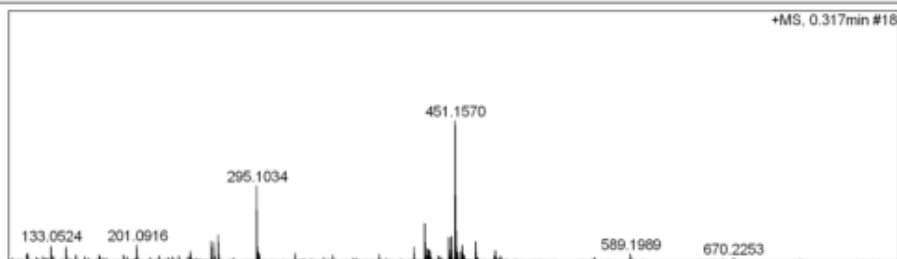

| Meas. m/z | #  | Formula               | Score  | m/z      | err [mDa] | err [ppm] | mSigma | rdb  | e <sup>-</sup> Conf | N-Rule |
|-----------|----|-----------------------|--------|----------|-----------|-----------|--------|------|---------------------|--------|
| 451.1570  | 1  | C 20 H 28 Na O 10     | 96.12  | 451.1575 | 0.4       | 1.0       | 10.9   | 6.5  | even                | ok     |
|           | 2  | C 22 H 27 O 10        | 17.80  | 451.1599 | 2.8       | 6.3       | 11.7   | 9.5  | even                | ok     |
|           | 3  | C 18 H 23 N 6 O 8     | 100.00 | 451.1572 | 0.2       | 0.3       | 15.3   | 10.5 | even                | ok     |
|           | 4  | C 21 H 24 N 4 Na O 6  | 38.93  | 451.1588 | 1.8       | 3.9       | 16.7   | 11.5 | even                | ok     |
|           | 5  | C 17 H 27 N 2 O 12    | 55.52  | 451.1559 | -1.2      | -2.6      | 18.3   | 5.5  | even                | ok     |
|           | 6  | C 19 H 19 N 10 O 4    | 45.02  | 451.1585 | 1.5       | 3.3       | 19.0   | 15.5 | even                | ok     |
|           | 7  | C 17 H 20 N 10 Na O 4 | 63.75  | 451.1561 | -0.9      | -2.0      | 19.1   | 12.5 | even                | ok     |
|           | 8  | C 15 H 15 N 16 O 2    | 51.02  | 451.1558 | -1.2      | -2.6      | 21.9   | 16.5 | even                | ok     |
|           | 9  | C 18 H 16 N 14 Na     | 73.60  | 451.1575 | 0.4       | 0.9       | 24.0   | 17.5 | even                | ok     |
|           | 10 | C 16 H 24 N 6 Na O 8  | 22.91  | 451.1548 | -2.3      | -5.0      | 24.3   | 7.5  | even                | ok     |
|           | 11 | C 14 H 19 N 12 O 6    | 17.39  | 451.1545 | -2.5      | -5.6      | 26.0   | 11.5 | even                | ok     |
|           | 12 | C 13 H 16 N 16 Na O 2 | 5.74   | 451.1534 | -3.6      | -8.0      | 28.5   | 13.5 | even                | ok     |
|           | 13 | C 15 H 28 N 2 Na O 12 | 5.80   | 451.1534 | -3.6      | -8.0      | 28.6   | 2.5  | even                | ok     |
|           | 14 | C 22 H 20 N 8 Na O 2  | 9.56   | 451.1601 | 3.1       | 6.9       | 28.6   | 16.5 | even                | ok     |
|           | 15 | C 20 H 15 N 14        | 12.00  | 451.1599 | 2.8       | 6.3       | 30.3   | 20.5 | even                | ok     |
|           | 16 | C 11 H 11 N 22        | 3.93   | 451.1532 | -3.9      | -8.6      | 31.1   | 17.5 | even                | ok     |
|           | 17 | C 13 H 23 N 8 O 10    | 3.69   | 451.1532 | -3.9      | -8.6      | 34.1   | 6.5  | even                | ok     |
|           | 18 | C 29 H 23 O 5         | 6.80   | 451.1540 | -3.0      | -6.7      | 44.4   | 18.5 | even                | ok     |
|           | 19 | C 7 H 16 N 20 Na O 3  | 2.88   | 451.1608 | 3.6       | 8.0       | 53.0   | 9.5  | even                | ok     |
|           | 20 | C 5 H 11 N 26 O       | 3.83   | 451.1604 | 3.3       | 7.4       | 53.4   | 13.5 | even                | ok     |
|           | 21 | C 30 H 19 N 4 O       | 14.03  | 451.1553 | -1.7      | -3.8      | 57.2   | 23.5 | even                | ok     |

Figure S7: HR-ESI-MS of compound 1

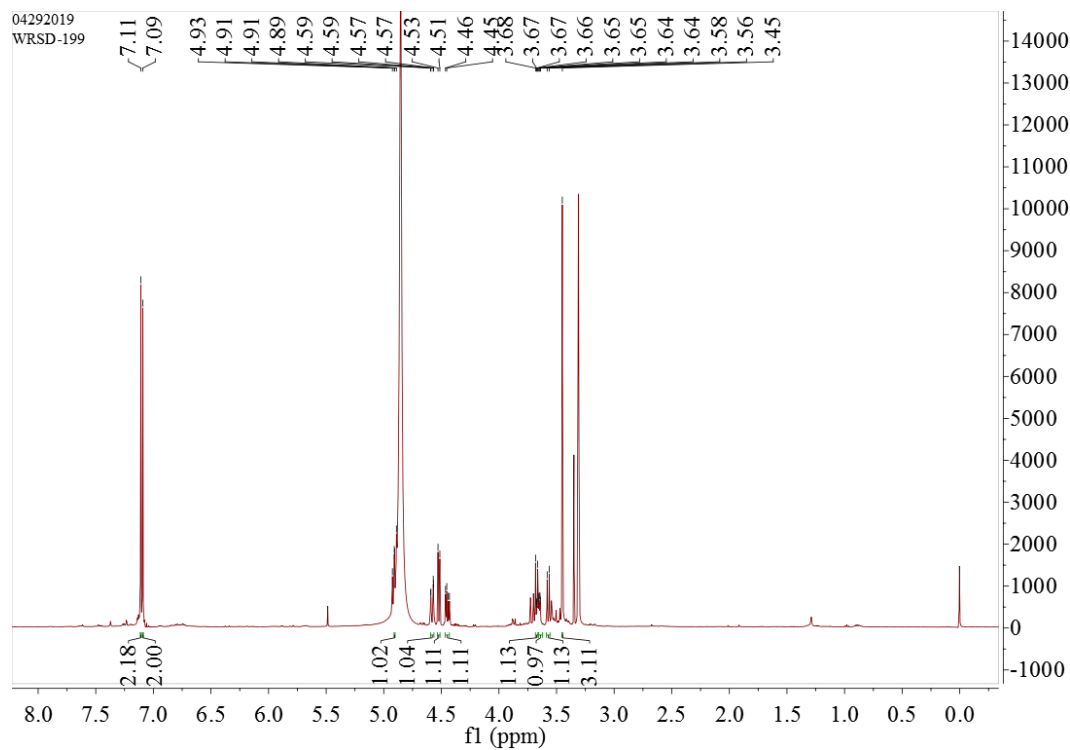

Figure S8:  $^1\text{H}$  NMR spectrum of compound **2** in methanol- $d_4$  (500 MHz)

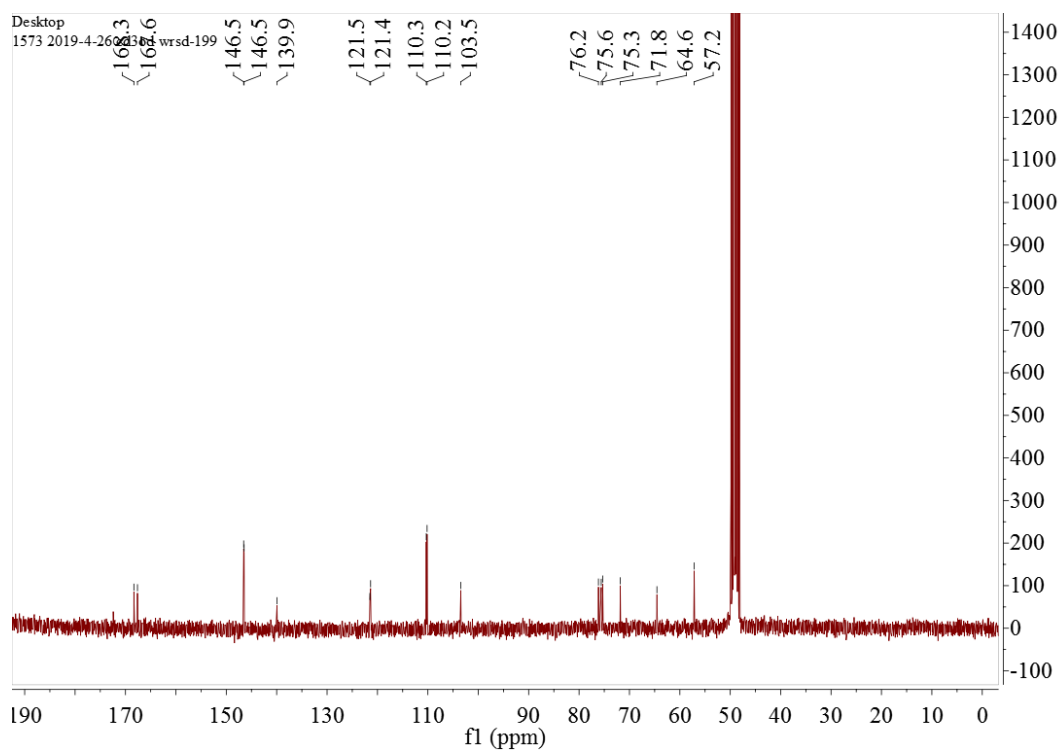

Figure S9:  $^{13}\text{C}$  NMR spectrum of compound **2** in methanol- $d_4$  (125 MHz)

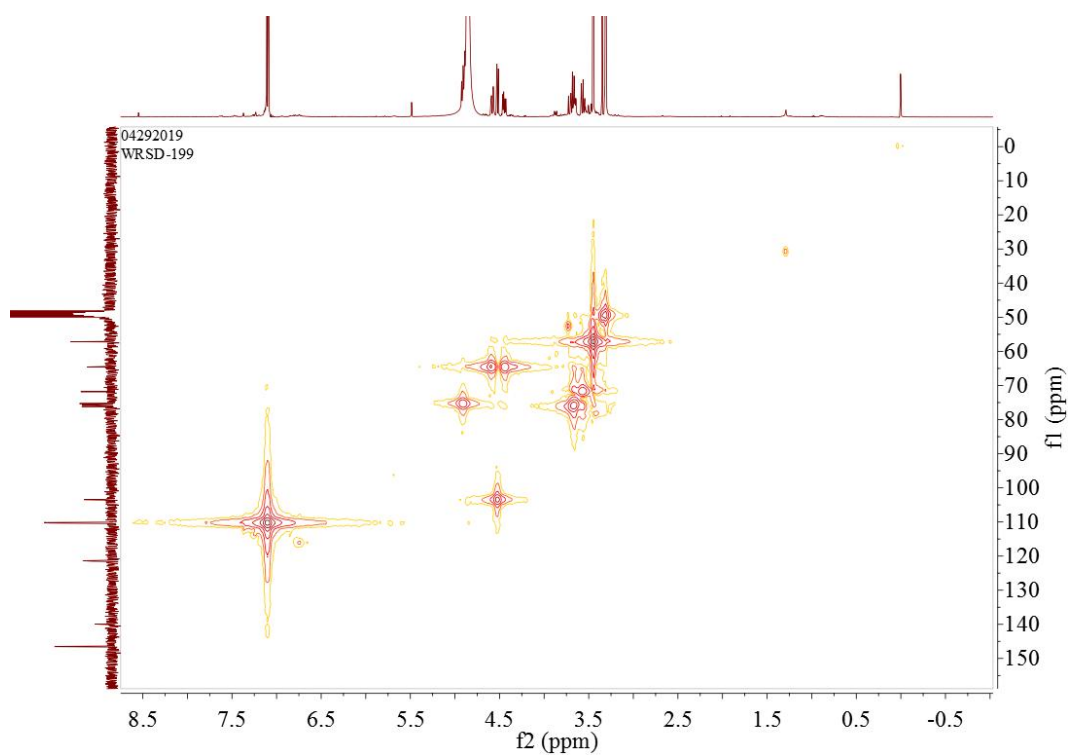

Figure S10: HMBC spectrum of compound **2** in methanol- $d_4$

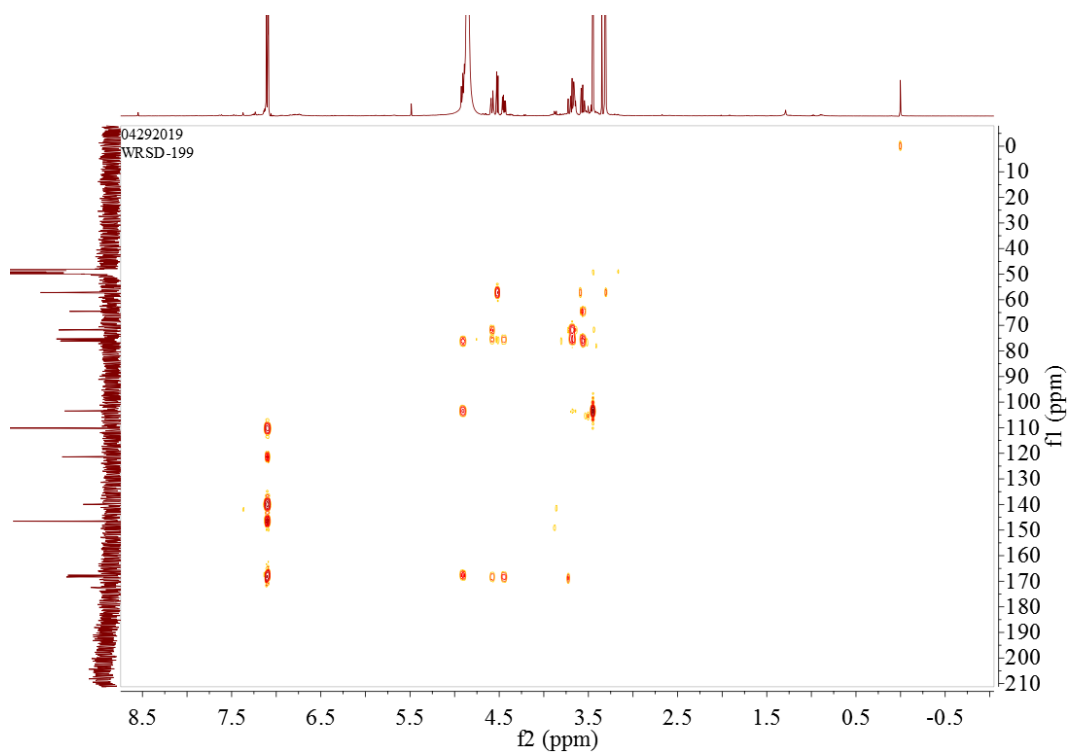

Figure S11: HMBC spectrum of compound **2** in methanol- $d_4$



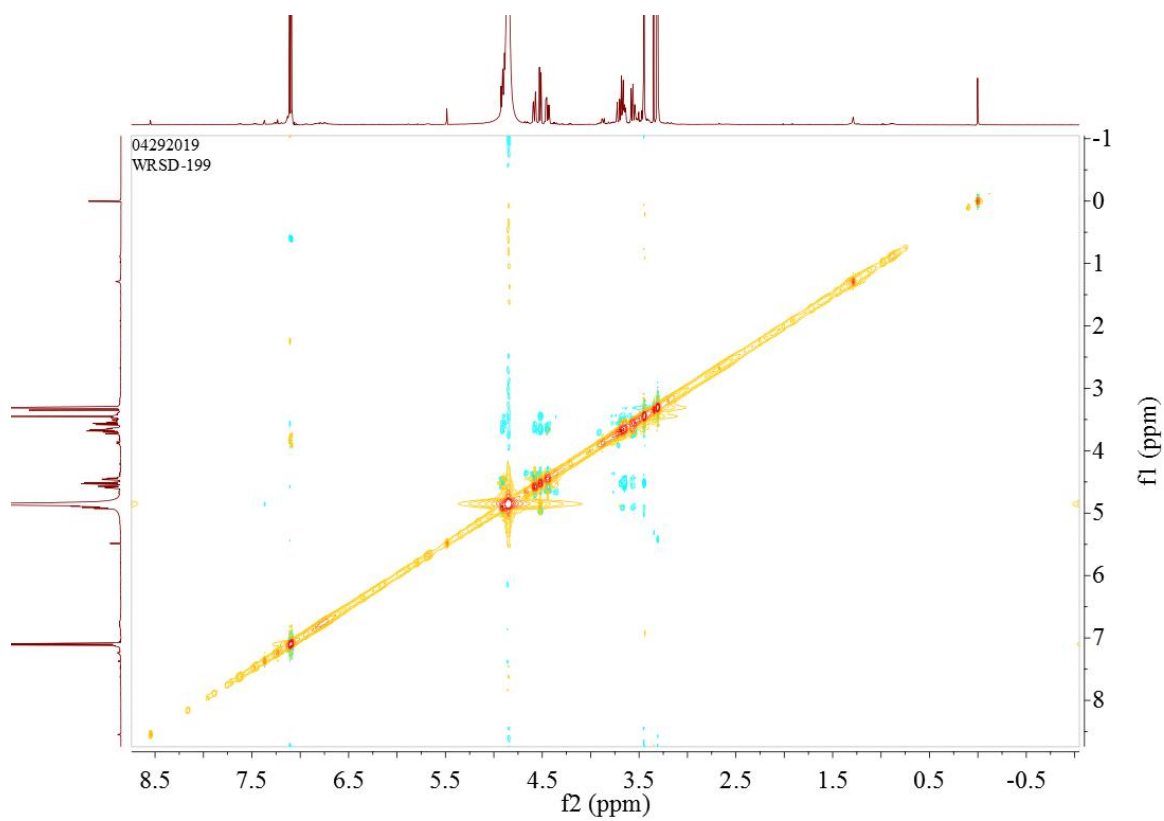

Figure S12: NOESY spectrum of compound **2** in methanol- $d_4$

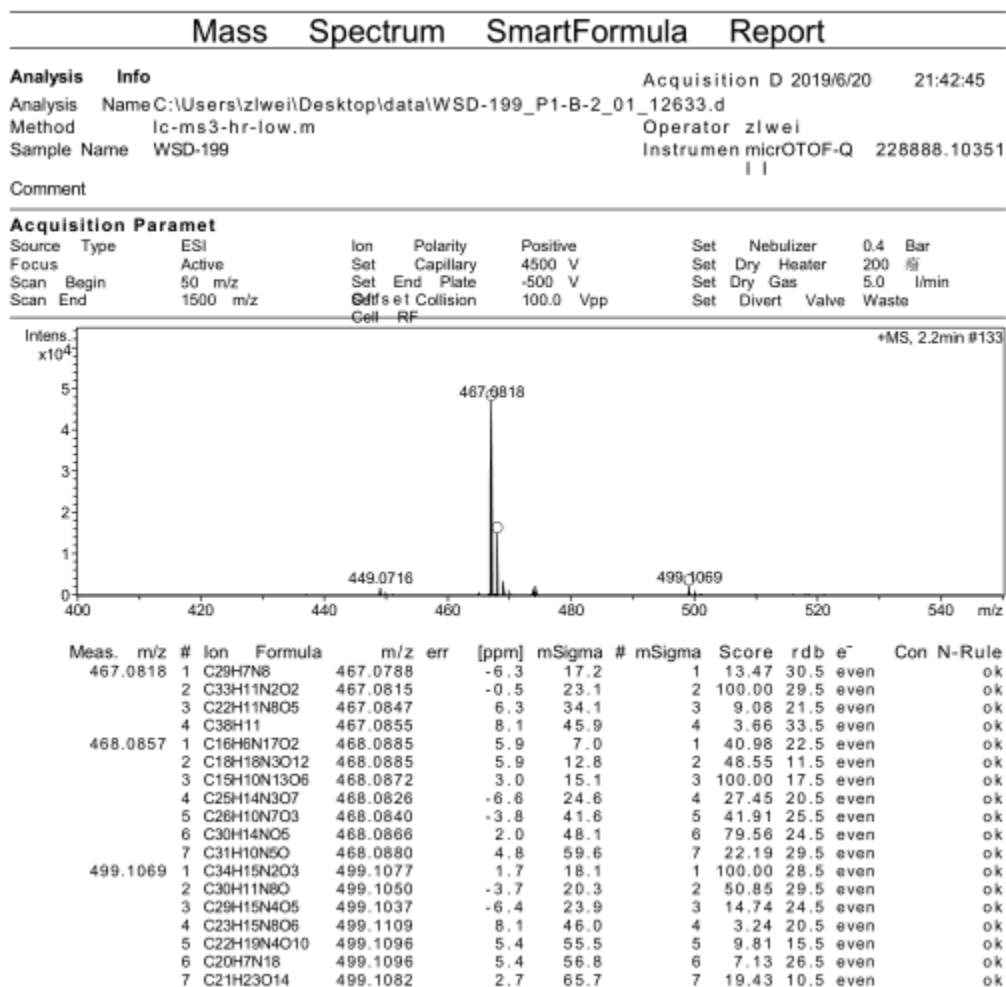

Figure S13: HR-ESI-MS of compound 2

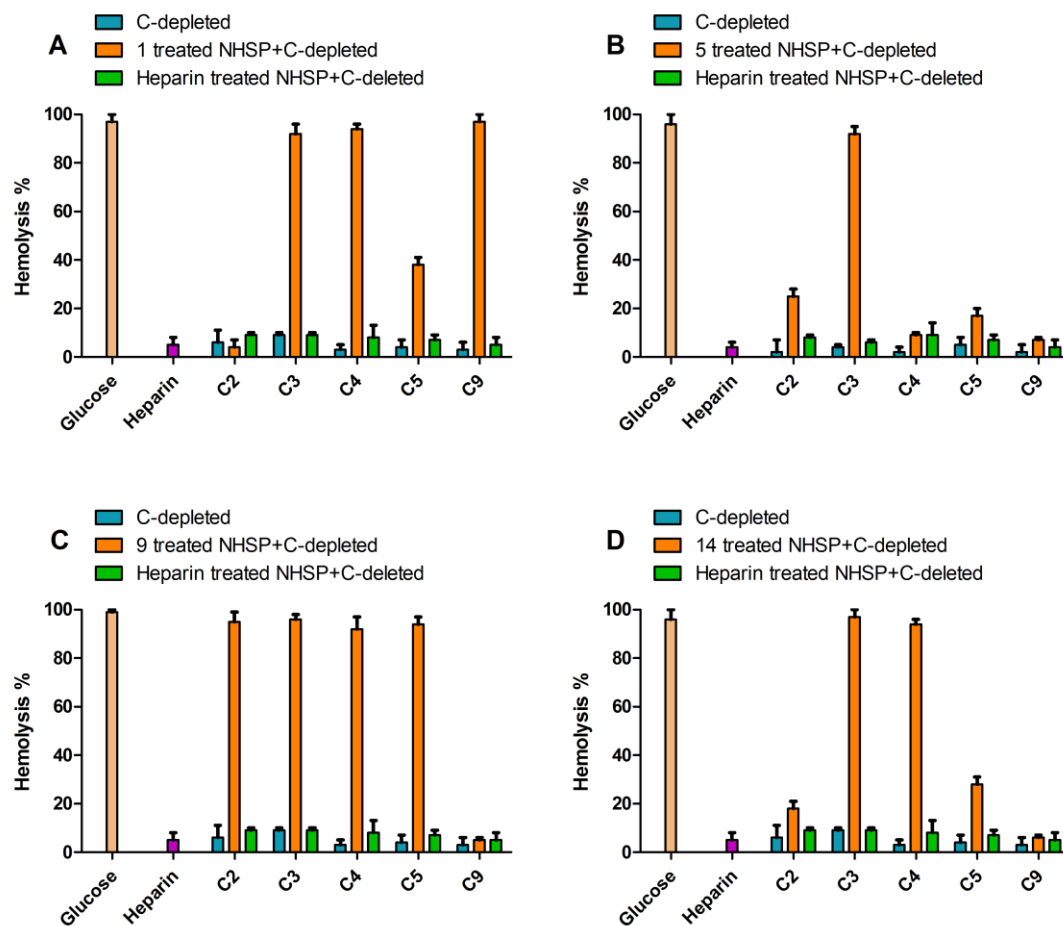

Figure S14: Targets of compounds **1** (A), **5** (B), **9** (C), and **14** (D) in complement activation cascade. 1-, 5-, 9-, and 14-treated sera were mixed with various complement-depleted (C-depleted) sera, and the capacity to restore hemolytic capacity of depleted sera by the CP was estimated by adding sheep antibody-sensitized erythrocytes. Data were expressed as mean  $\pm$  SD ( $n = 3$ ).

Table S1: Anti-complementary activity through the classical pathway (CP) of compounds **1–18**<sup>a</sup>

| Compounds            | CH <sub>50</sub> (mM) |
|----------------------|-----------------------|
| <b>1</b>             | 0.40 ± 0.03           |
| <b>2</b>             | 0.98 ± 0.06           |
| <b>3</b>             | NE                    |
| <b>4</b>             | 2.08 ± 0.27           |
| <b>5</b>             | 0.57 ± 0.01           |
| <b>6</b>             | 1.76 ± 0.08           |
| <b>7</b>             | NE                    |
| <b>8</b>             | 1.51 ± 0.21           |
| <b>9</b>             | 0.51 ± 0.07           |
| <b>10</b>            | NE                    |
| <b>11</b>            | NE                    |
| <b>12</b>            | 1.46 ± 0.24           |
| <b>13</b>            | 1.54 ± 0.12           |
| <b>14</b>            | 0.53 ± 0.05           |
| <b>15</b>            | 0.90 ± 0.07           |
| <b>16</b>            | NE                    |
| <b>17</b>            | NE                    |
| <b>18</b>            | NE                    |
| Heparin <sup>b</sup> | 0.30 ± 0.02           |

<sup>a</sup>Data were expressed as mean ± SD (n = 3); CH<sub>50</sub> stand for the 50% hemolytic inhibition concentrations through the classic pathway; NE denotes that this compound has no inhibitory effect at the maximal concentration tested.

<sup>b</sup>Heparin was used as the positive controls (mg/mL).
